# Supplementary material
Source: PubMed Central journal article supplement (PMC3111289)
Supplement: 1106389108_pnas.1106389108_SI.pdf [file 1106389108_pnas.1106389108_SI.pdf]

# Supporting Information

Cho and Harrison 10.1073/pnas.1106389108

## SI Methods.

**Cloning, Expression, and Purification of *Saccharomyces cerevisiae* (*Sc*) Scm3, Cse4, and H4.** Clones of *Sc* Cse4, H4, and Scm3 were obtained by PCR amplification from a *S. cerevisiae* genomic library and subcloned into pET vectors modified for ligation-independent cloning (LIC). Scm3 was cloned into an LIC vector encoding an N-terminal His<sub>6</sub> tag and a tobacco etch virus (TEV) cleavage site. Cse4 and H4 were expressed without affinity tags. Constructs were transformed into Rosetta (DE3) pLysS *Escherichia coli* competent cells (Novagen) and used for protein expression. For *Sc* Cse4 and H4 purification, cells were grown at 37°C in LB medium and induced at OD = 0.6 with 0.2 mM isopropyl β-D-1-thiogalactopyranoside. Harvested cells were resuspended in 30 mM Tris-HCl, pH 8.0, 500 mM NaCl, and 3 mM β-mercaptoethanol with protease inhibitor cocktail tablets. Cells were sonicated and insoluble pellets were harvested from centrifugation at 20,000 × g for 1 h. Pellets were then resuspended in inclusion-body washing buffer (30 mM Tris-HCl, pH 8.0, 500 mM NaCl, 1% triton X-100, and 3 mM β-mercaptoethanol), incu-

bated at 4°C for 1 h shaking, and centrifuged at 20,000 × g for 30 min. This washing procedure was repeated three times. Isolated inclusion bodies of *Sc* Cse4 and H4 were solubilized in 30 mM Tris-HCl, pH 8.0, 7 M guanidinium hydrochloride (GuHCl), 10 mM DTT, and insoluble debris was removed by centrifugation at 20,000 × g for 30 min. Refolding of 7 M GuHCl solubilized *Sc* Cse4 and H4 proceeded by two-step dialysis in the presence or absence of *Sc* Scm3. Step 1 was dialysis against 30 mM Tris-HCl, pH 8.0, 2 M NaCl, 10 mM DTT; step 2 was dialysis against 30 mM Tris-HCl, pH 8.0, 0.5 M NaCl, 1 mM DTT. *Sc* Scm3 was expressed and purified as described for *Kluyveromyces lactis* Scm3 (see *Methods*). Misfolded proteins were removed by centrifugation at 20,000 × g for 30 min. Soluble fractions were then concentrated and applied to a Superdex 200 size exclusion column (Prep grade 16/60; GE healthcare) pre-equilibrated with 30 mM Tris-HCl, pH 8.0, 500 mM NaCl, 1 mM TCEP [tris(2-carboxyethyl)phosphine].

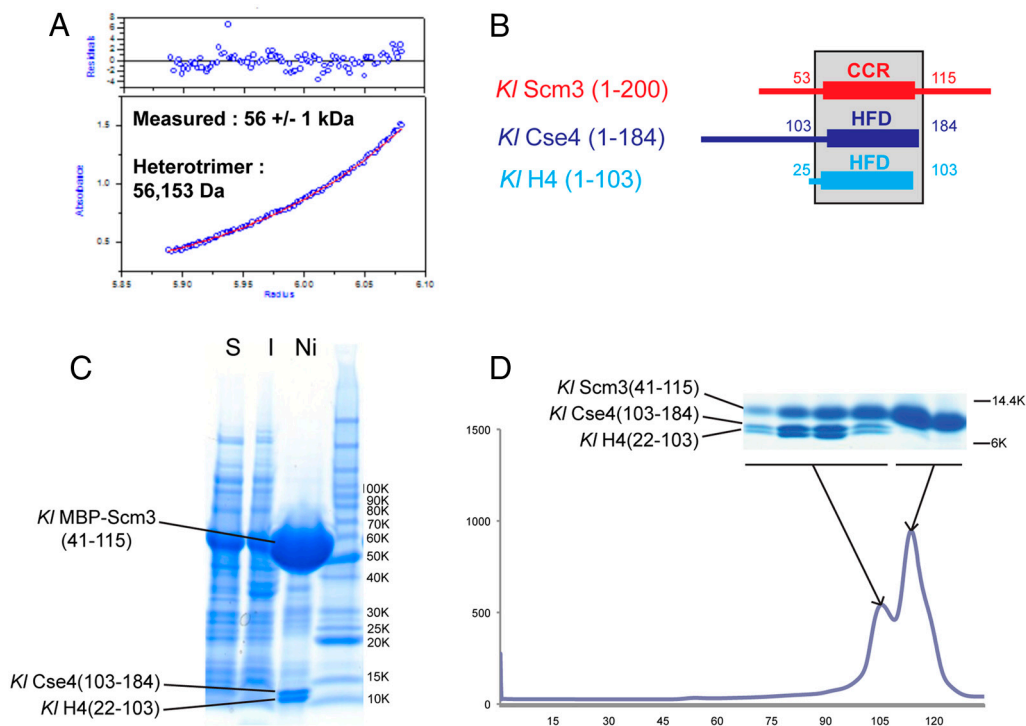

**Fig. S1.** Properties of *K. lactis* (*Kl*) Scm3:Cse4:H4 and its minimum stable complex. (A) Sedimentation equilibrium analytical ultracentrifugation of *Kl* Scm3:Cse4:H4 complex; the measured molecular mass corresponds to a heterotrimer. (B) Minimum required fragments of *Kl* Scm3, Cse4, and H4 for stable complex formation. Purified Scm3:Cse4:H4 complex was treated with either trypsin or subtilisin; protease-resistant fragments (gray box) were determined by mass spectrometry. CCR, central conserved region of Scm3; HFD, histone-fold domain. (C) Expression of the minimum stable complex of *Kl* Scm3(41–115):Cse4(103–184):H4(22–103). Scm3 (41–115) is sufficient for proper folding of Cse4 HFD and H4 HFD. S, soluble fraction; I, insoluble fraction; Ni, Ni-NTA eluate. (D) Purification of *Kl* Scm3(41–115):Cse4(103–184):H4(22–103) by size exclusion chromatography. SDS-PAGE gel shows that the three proteins coelute as a stable complex.



**A**

```

KLa_Scm3p/41-115  RDG-----VYVIMSKENRLLPKLSDEEEMERKRDENMQRVWSQIQKYESIDNCGVDIDLQGTGEVIEDNGHRLNLSNE
SCe_Scm3p/64-144  SRPIAERNGHVYIMSKENHIIPKLTDDEEMERKRLADENMKRVSNIIISKYESIEEGDVLVDLKTGEIVEDNGHIKTLTAN
CGI_Scm3p/62-142  YKEVKKKNGRAYIYIMSKENQLPKLTDDEEMERKRLADQRMQRVWSNIIIDKYESINVDGVDIDLQSGEIIITDNGHIRNLNTG
AGo_Scm3p/34-108  PAG-----VYVIMSRRENEPPLRLSDAEEMERRRADENMQAVTRTEKFEALDDGVDVLDLRTGEIIVEDNGHIRLADG
SKu_Scm3p/65-145  VRPVAERNGHVYIMSKENQVLPKLTDEEMERKRDENMQRVWSNIIISKYESIEDGDLVDLKTGEIIVEDNGHIRKLTVN
SKl_Scm3p/66-146  NDPVTQHGDVTFIMSKENQLPKLTDEEMERKRDENMQRVWSQIQKVENVEDGDLIDLRTGEIIVEDNGHIRLGSAT
Kwa_Scm3p/67-147  EQGTQEHNDVVYIMSKESQLPKLTDEEMDRKRDENMQRVWSQIQKFEALDDGVDLIDLNTGEIVEDNGHVRLSER

```

  

```

KLa_Cse4p/103-184  STDLLISRMPPFARLVKEVTDQFTTESEPLRWQSMAIMALQEAASEAYLVGLLEHTNLLALHAKRRTIMRKMQLARRIRGQFI
SCe_Cse4p/148-229  STDLLISKIPFARLVKEVTDFTTKDQDLRWQSMAIMALQEAASEAYLVGLLEHTNLLALHAKRRTIMKKMQLARRIRGQFI
SKu_Cse4p/148-229  STDLLISKIPFARLVKEVTDFTTKDQDLRWQSMAIMALQEAASEAYLVGLLEHTNLLALHAKRRTIMKKMQLARRIRGQFI
Kwa_Cse4p/102-183  STDLLISKMPFARLVKEVTDQFTTEEQQLRWQSMAIMALQEAASEAYLVGLLEHTNLLALHAKRRTIMRKMQLARRIRGQFI
SKl_Cse4p/59-140  STELLISRMPPFARLVKEVTDQFTTDEQQLRWQSMAILALQEAASEAYLVGLLEHTNLLALHAKRRTIMKKMQLARRIRGQFI
AGo_Cse4p/123-204  STELLISRMPPFARLVKEVTDQFTTVDQMRWQSMAILALQEAASEAYLVGLLEHTNLLALHAKRRTVMRKMQLARRIRGQFI
CGI_Cse4p/159-240  STALLIQKIPFAKLVKEVTEEFAGESQDLRWQSMAILALQEAASEAYLVGLLEHTNLLALHAKRRTIMKKMQLARRIRGQFI

```

  

```

KLa_H4/22-103     ILRDNIQGITKPAIRRLARRGGVKRISGLIYEEVRVLKTFLESVIRDAVYTEHAKRKTVTLSDVYALRRQGRTYLGFGG
SCe_H4/22-103     ILRDNIQGITKPAIRRLARRGGVKRISGLIYEEVRVLKSFLESVIRDSVYTEHAKRKTVTLSDVYALRRQGRTYLGFGG
CGI_H4/22-103     ILRDNIQGITKPAIRRLARRGGVKRISGLIYEEVRVLKSFLESVIRDAVYTEHAKRKTVTLSDVYALRRQGRTYLGFGG
AGo_H4/22-103     ILRDNIQGITKPAIRRLARRGGVKRISGLIYEDVRVLKSFLESVIRDAVYTEHAKRKTVTLSDVYALRRQGRTYLGFGG
SKu_H4/22-103     ILRDNIQGITKPAIRRLARRGGVKRISGLIYEEVRVLKSFLESVIRDSVYTEHAKRKTVTLSDVYALRRQGRTYLGFGG
SKl_H4/22-103     ILRDNIQGITKPAIRRLARRGGVKRISGLIYEEVTVLTKTFLESVIRDAVYTEHAKRKTVTLSDVYALRRQGRTYLGFGG
Kwa_H4/22-103     ILRDNIQGITKPAIRRLARRGGVKRISGLIYEEVRVLKSFLESVIRDAVYTEHAKRKTVTLSDVYALRRQGRTYLGFGG

```

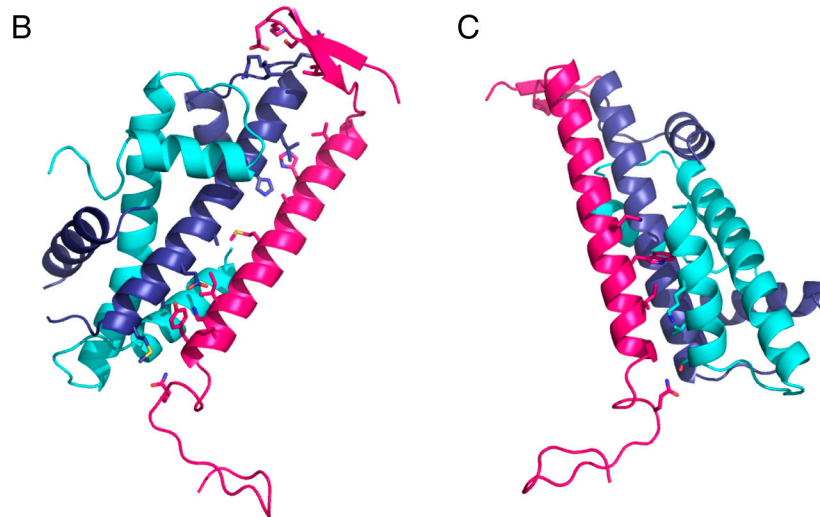

**Fig. S3.** Interface of Scm3:Cse4 and Scm3:H4 in the heterotrimer. (A) Multiple sequence alignments of Scm3 (central conserved region), Cse4 and H4 (HFDs) from point-centromere yeasts. Blue boxes represent residues at the interface of Scm3 and Cse4; red boxes, residues at the interface of Scm3 and H4. *KLa*, *K. lactis*; *SCe*, *S. cerevisiae*; *CGI*, *Candida glabrata*; *AGo*, *Ashbya gossypii*; *SKu*, *Saccharomyces kudriavzevii*; *SKl*, *Saccharomyces kluyveri*; *KWa*, *Kluyveromyces waltii*. (B) Interface of Scm3 and Cse4. Interacting residues are shown as stick models. (C) Interface of Scm3 and H4, in a similar representation.

**A**

```

K.lactis_Cse4/103-184  STDLLISRMPPFARLVKEVTDQFTT---ESEPLRWQSMAIMALQEAASEAYLVGLLEHTNLLALHAKRRTIMRKMQLARRIRGQFI---
S.cerevisiae_Cse4/148-229  STDLLISKIPFARLVKEVTDFTTKDQDLRWQSMAIMALQEAASEAYLVGLLEHTNLLALHAKRRTIMKKMQLARRIRGQFI---
Human_CENPA/57-140  STHLLLRKLPFSRLAREICVKFTR---GVDFNWQAQALLAQEAEEAFVLVHLFEDAYLLSLHAGRVTLFPPKDVQLARRIRGLEEGLG
Mouse_CENPA/51-134  STDLLFRKKPFMSMVREICEKFSR---GVDFNWQAQALLAQEAEEAFVLVHLFEDAYLLSLHAGRVTLFPPKDVQLARRIRGLEEGLG
Bovine_CENPA/55-138  TTHLLLRKSPFCRLAREICVQFTR---GVDFNWQAQALLAQEAEEAFVLVHLFEDAYLLSLHAGRVTLFPPKDVQLARRIRGIEEGLG
S.pombe_Cnp1/38-120  STDLLIQRLPFSRIVREISEEVANFSTVDGLRWQSTALQCLQEAEEAFVLVHLFEDTNCALHAKRVTIMQRDMQLARRIRGA-----

```

  

**B**

```

K.lactis_Scm3/41-115  -RDGVVYIMSKENRLLPKLSDEEEMERHKKADENMKRVWSQIQKY-ESIDNCGVDIDLQGTGEVIEDNGHRLNLSNE
S.cerevisiae_Scm3/69-144  ERNGHVYIMSKENHIIPKLTDDEEMERHKLADENMKRVWSNIIISKY-ESIEEQGDLVDLKTGEIVEDNGHIKTLTAN
Human_HJURP/1-69  -MLGTLRAMEGED----VEDDQLLQKLRASRRRFQRRMQRLIEKY-NQPFEDTPVVMATLTYETPQG-LRIWGG
Mouse_HJURP/1-62  -----MESMG-----RQDRRLHQKLKESRRFQTLMKRLIAKY-NQPFEDDPVLEMRTLTYETPQG-LRWGGK
Bovine_HJURP/1-62  -----MEGEV-----LSEDELLMKLRDSRCRFQRRMQRLIEKY-NQPFEDGPVIQMSLTYETPQG-LRIWGGG
S.pombe_Scm3/16-91  -SCPHLLSFQSVFENTNPTACDDVFCRRIESEKKNYDFLESIFKYG-GRDTSIDAEVDLAGEIIVNNGHLEALKTK

```

**Fig. S4.** Multiple sequence alignments of centromeric histone H3s and its chaperone proteins. (A) Multiple sequence alignment of the HFDs of Cse4 and its orthologs from other eukaryotes, including human CENP-A. (B) Multiple sequence alignment of the central conserved region of Scm3 and the N-terminal regions of CenH3 chaperones from other eukaryotes, including human HJURP. The Lys-Tyr pair, conserved among CenH3 chaperones from yeast to man, is marked in the red box.



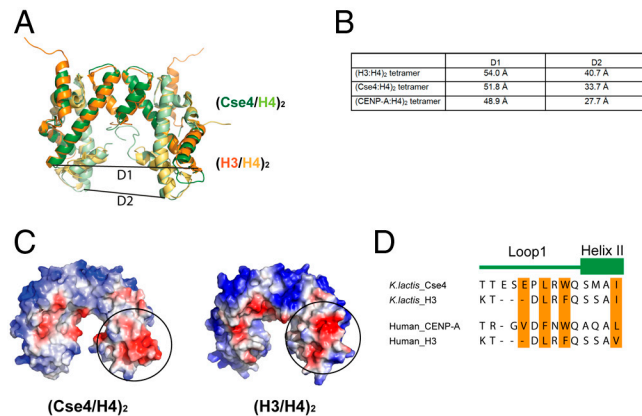

**Fig. S7.** Comparison of (Cse4 : H4)<sub>2</sub> tetramer with (H3/H4)<sub>2</sub> tetramer. (A) Comparison of (Cse4 : H4)<sub>2</sub> and (H3 : H4)<sub>2</sub> (PDB ID code 1ID3). Two sets of distances (D1 and D2) were measured to compare the compactness of each tetramer. (B) Measured distances, D1 and D2, from (H3 : H4)<sub>2</sub>, (Cse4 : H4)<sub>2</sub>, and (CENP-A/H4)<sub>2</sub> tetramer. (C) Comparison of surface charge distribution in the CENP-A targeting domain (CATD) of (Cse4 : H4)<sub>2</sub> and (H3 : H4)<sub>2</sub>. In contrast with (CENP-A/H4)<sub>2</sub>, the surface charge distributions in (Cse4 : H4)<sub>2</sub> and (H3 : H4)<sub>2</sub> at CATD are similarly negative. (D) Sequence alignment of loop1 from CENP-A vs. H3 and from Cse4 vs. H3. Residues proposed to increase hydrophobicity in loop1 of CENP-A are marked by orange boxes. Cse4 counterparts of those hydrophobic residues are not more hydrophobic than their counterparts in H3.

**Table S1. Data collection and refinement statistics for the Scm3:Cse4:H4 and (Cse4 : H4)<sub>2</sub> complexes**

| Data collection                                            | Scm3:Cse4:H4 complex                    | (Cse4 : H4) <sub>2</sub> complex |
|------------------------------------------------------------|-----------------------------------------|----------------------------------|
| Resolution (last shell), Å                                 | 50–2.3 (2.38–2.30)                      | 50–2.6 (2.69–2.60)               |
| Wavelength, Å                                              | 0.9795                                  | 0.9795                           |
| Space group                                                | <i>P</i> 2 <sub>1</sub> ,2 <sub>1</sub> | <i>R</i> 3                       |
| Unit cell dimensions ( <i>a</i> , <i>b</i> , <i>c</i> ), Å | 32.72, 65.53, 121.10                    | 169.48, 169.48, 81.22            |
| Unit cell Angles ( $\alpha$ , $\beta$ , $\gamma$ ), °      | 90, 90, 90                              | 90, 90, 120                      |
| <i>I</i> / $\sigma$ (last shell)                           | 17.0 (1.5)                              | 15.0 (1.3)                       |
| <i>R</i> <sub>sym</sub> (last shell), %*                   | 0.085 (0.637)                           | 0.115 (0.814)                    |
| Completeness (last shell), %                               | 94.7 (55.3)                             | 99.9 (98.8)                      |
| Number of reflections                                      | 47,110                                  | 100,769                          |
| <i>unique</i>                                              | 11,636                                  | 26,486                           |
| Redundancy                                                 | 4.1                                     | 3.8                              |
| Refinement                                                 |                                         |                                  |
| Resolution, Å                                              | 50–2.3                                  | 50–2.6                           |
| No. of reflections                                         | 11,073                                  | 25,302                           |
| <i>working</i>                                             | 10,518                                  | 23,960                           |
| <i>free</i>                                                | 555                                     | 1,342                            |
| <i>R</i> <sub>work</sub> , % <sup>†</sup>                  | 22.0                                    | 21.8                             |
| <i>R</i> <sub>free</sub> , % <sup>†</sup>                  | 25.7                                    | 27.6                             |
| Ramachandran plot, % (favored/additional/disallowed)       | 99.5/0.5/0                              | 98.3/1.7/0                       |
| Structure/stereochemistry                                  |                                         |                                  |
| No. of atoms                                               |                                         |                                  |
| <i>protein</i>                                             | 1,636                                   | 4,808                            |
| <i>iodide</i>                                              | 2                                       |                                  |
| H <sub>2</sub> O                                           | 58                                      | 14                               |
| rmsd bond lengths, Å                                       | 0.014                                   | 0.011                            |
| rmsd bond angles, °                                        | 1.423                                   | 1.403                            |

\* $R_{sym} = \frac{\sum_j |I_j - \langle I \rangle|}{\sum_j I_j}$ , where  $I_j$  is the measured intensity of reflection  $j$ , and  $\langle I \rangle$  is the mean intensity for multiply recorded reflections.

<sup>†</sup> $R_{work,free} = \frac{\sum ||F_{obs}| - |F_{calc}||}{|F_{obs}|}$ , where the working and free *R* factors are calculated using the working and free reflection sets, respectively.
